# Supplementary material for: Expression and secretion of CXCL12 are enhanced in autosomal dominant polycystic kidney disease
Source: PubMed Central journal article supplement — BMB Rep. 2019 Jul 31;52(7):463–8. doi: 10.5483/BMBRep.2019.52.7.112 (PMC6675246; doi:10.5483/bmbrep.2019.52.7.112), 2019-07-31
Supplement: BMB-52-463_Supple.pdf [file BMB-52-463_Supple.pdf]

**Title:** Expression and secretion of CXCL12 are enhanced in autosomal dominant polycystic kidney disease

**Author's name:** Hyunho Kim<sup>1</sup>, Jinmo Sung<sup>1</sup>, Hyunsuk Kim<sup>2</sup>, Hyunjin Ryu<sup>3</sup>, Hayne Cho Park<sup>4</sup>, Yun Kyu Oh<sup>5</sup>, Hyun-seob Lee<sup>6</sup>, Kook-Hwan Oh<sup>3</sup>, Curie Ahn<sup>3,\*</sup>

**Affiliation:** <sup>1</sup> Center for Medical Innovation, Biomedical Research Institute, Seoul National University Hospital, Seoul, Republic of Korea

<sup>2</sup> Internal Medicine, Hallym University Medical Center, Chuncheon Sacred Heart Hospital, Chuncheon-si, Gangwon-do, Republic of Korea

<sup>3</sup> Department of Internal Medicine, Seoul National University College of Medicine, Seoul, Republic of Korea

<sup>4</sup> Department of Internal Medicine, Hallym University Medical Center, Kangnam Sacred Heart Hospital, Seoul, Republic of Korea

<sup>5</sup> Department of Internal Medicine, Seoul National University, Boramae Medical Center, Seoul, Republic of Korea

<sup>6</sup> Genomics Core Facility, Department of Transdisciplinary Research and Collaboration, Biomedical Research Institute, Seoul National University Hospital, Seoul, Republic of Korea

**Running Title:** Upregulation of CXCL12 in renal cyst cells

**Keywords:** Autosomal dominant polycystic kidney disease (ADPKD), Cyst, hTERT, CXCL12, CXCR4,

**\*Corresponding Author's Information:** Tel: +82-2-2072-2222; Fax: +82-2-741-4876; E-mail: [curie@snu.ac.kr](mailto:curie@snu.ac.kr)

## Supplementary Figure

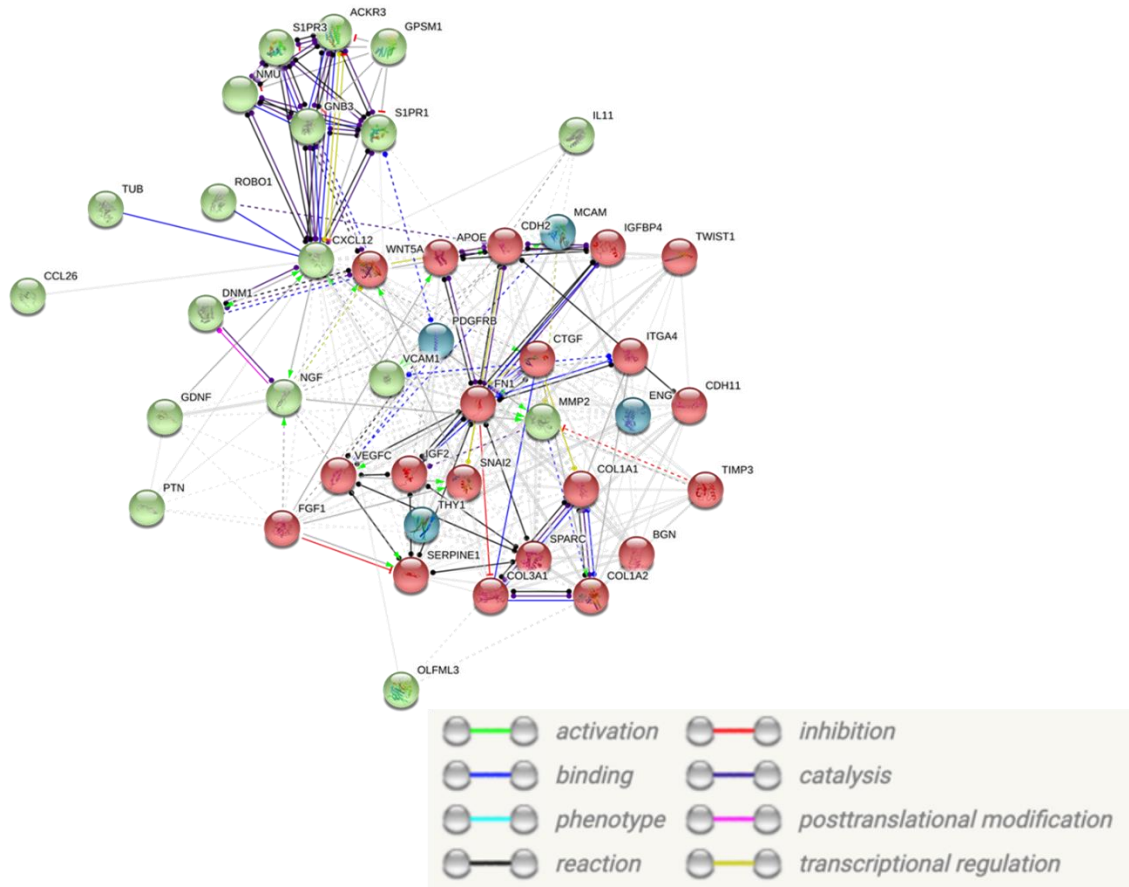

**Figure S1. CXCL12 protein-protein interaction network analysis.** The functional interaction network among 42 differentially expressed genes of the significant GO term of up-regulated genes in the ADPKD renal cyst cell lines (RC1, RC2, RC3) vs the normal proximal tubular cell line (RPTEC/TERT1) using STRING v11.0.
